# Supplementary material for: Novel dihydroartemisinin dimer containing nitrogen atoms inhibits growth of endometrial cancer cells and may correlate with increasing intracellular peroxynitrite
Source: PubMed Central journal article supplement (PMC6820742; doi:10.1038/s41598-019-52108-6), 2019-10-29
Supplement: 41598_2019_52108_MOESM1_ESM.pdf [file 41598_2019_52108_MOESM1_ESM.pdf]

Novel dihydroartemisinin dimer containing nitrogen atoms inhibits growth of endometrial cancer cells and may correlate with increasing intracellular peroxynitrite

Yan Zhu \*, Christian Klausen, Jieyun Zhou, Xiangjie Guo, Yu Zhang, Hua Zhu, Zhao Li, Jung-Chien Cheng, Shuwu Xie, Wenjie Yang, Ying Li, Peter C.K. Leung\*

| V (mm <sup>3</sup> ) = 1/2 × a × b <sup>2</sup> = 1/2 × major axis × minor axis × minor axis      Double figures mean there are two separate tumours and the volume is calculated by adding both together |     |                   |                |                |             |                      |                |                |             |        |                |                |             |  |
|-----------------------------------------------------------------------------------------------------------------------------------------------------------------------------------------------------------|-----|-------------------|----------------|----------------|-------------|----------------------|----------------|----------------|-------------|--------|----------------|----------------|-------------|--|
| Group                                                                                                                                                                                                     | NO. | 0 (Before dosing) |                |                |             | Dosing started --1st |                |                |             | 2nd    |                |                |             |  |
|                                                                                                                                                                                                           |     | Body Weight(g)    | Major axis(mm) | Minor axis(mm) | Volum (mm3) | B.W(g)               | Major axis(mm) | Minor axis(mm) | Volum (mm3) | B.W(g) | Major axis(mm) | Minor axis(mm) | Volum (mm3) |  |
| control                                                                                                                                                                                                   | 37  | 23.5              | 7.33           | 5.46           | 109.26      | 23.0                 | 7.64           | 6.50           | 161.40      | 23.1   | 8.36           | 6.60           | 182.08      |  |
|                                                                                                                                                                                                           | 56  | 20.7              | 6.27           | 5.49           | 94.49       | 21.4                 | 6.93           | 6.09           | 128.51      | 21.9   | 7.99           | 6.51           | 169.31      |  |
|                                                                                                                                                                                                           | 66  | 22.0              | 5.72/6.48      | 4.05/4.63      | 116.36      | 22.6                 | 6.45/6.91      | 4.85/5.13      | 166.78      | 23.4   | 7.00/7.42      | 4.75/6.42      | 231.88      |  |
|                                                                                                                                                                                                           | 79  | 23.2              | 8.37           | 5.98           | 149.66      | 23.6                 | 9.42           | 6.29           | 186.35      | 25.3   | 10.89          | 7.93           | 342.41      |  |
|                                                                                                                                                                                                           | 91  | 22.3              | 8.42           | 4.58           | 88.31       | 23.3                 | 9.08           | 5.06           | 116.24      | 23.7   | 10.21          | 5.41           | 149.41      |  |
|                                                                                                                                                                                                           | 120 | 20.9              | 7.23           | 4.98           | 89.65       | 21.3                 | 7.76           | 5.43           | 114.40      | 21.7   | 8.17           | 6.45           | 169.95      |  |
|                                                                                                                                                                                                           | 5   | 22.1              | 8.37           | 5.81           | 141.27      | 22.6                 | 9.11           | 5.51           | 138.29      | 23.5   | 9.59/5.30      | 7.05/3.07      | 263.30      |  |
|                                                                                                                                                                                                           | 77  | 23.8              | 7.49           | 5.11           | 97.79       | 22.7                 | 10.57          | 5.45           | 156.98      | 23.0   | 10.94          | 6.04           | 199.55      |  |
| ava                                                                                                                                                                                                       |     |                   |                |                | 110.85      |                      |                |                |             |        | 146.12         |                |             |  |
| SD                                                                                                                                                                                                        |     |                   |                |                | 23.48       |                      |                |                |             |        | 25.82          |                |             |  |
| carbo<br>3mg/kg                                                                                                                                                                                           | 119 | 21.1              | 8.10           | 6.71           | 182.35      | 21.4                 | 8.42           | 6.25           | 164.45      | 20.7   | 8.08           | 5.83           | 137.32      |  |
|                                                                                                                                                                                                           | 36  | 21.4              | 6.97           | 5.00           | 87.13       | 21.6                 | 7.44           | 4.85           | 87.50       | 22.2   | 7.47           | 5.3            | 104.92      |  |
|                                                                                                                                                                                                           | 60  | 22.9              | 6.28/3.71      | 4.44/3.51      | 84.75       | 23.5                 | 6.38/3.59      | 4.80/2.45      | 84.27       | 23.3   | 7.17/4.19      | 4.89/3.65      | 113.63      |  |
|                                                                                                                                                                                                           | 35  | 21.1              | 9.82           | 4.92           | 118.85      | 21.3                 | 10.97          | 6.37           | 222.56      | 22.9   | 11.60          | 6.54           | 248.08      |  |
|                                                                                                                                                                                                           | 111 | 20.5              | 6.91           | 5.05           | 88.11       | 21.2                 | 8.19           | 5.62           | 129.34      | 21.3   | 9.01           | 5.50           | 136.28      |  |
|                                                                                                                                                                                                           | 75  | 22.8              | 7.03/3.85      | 4.77/2.84      | 95.50       | 22.3                 | 6.73/3.85      | 4.70/3.85      | 102.86      | 23.3   | 8.27/3.77      | 5.60/3.36      | 150.95      |  |
|                                                                                                                                                                                                           | 84  | 21.1              | 6.97           | 4.49           | 70.26       | 22.5                 | 7.67           | 5.64           | 121.99      | 22.4   | 8.55           | 6.43           | 176.75      |  |
|                                                                                                                                                                                                           | 80  | 24.6              | 5.66           | 5.13           | 74.48       | 24.6                 | 6.28           | 5.95           | 111.16      | 24.5   | 7.09           | 5.94           | 125.08      |  |
| ava                                                                                                                                                                                                       |     |                   |                |                | 100.18      |                      |                |                |             |        | 128.02         |                |             |  |
| SD                                                                                                                                                                                                        |     |                   |                |                | 36.32       |                      |                |                |             |        | 45.95          |                |             |  |
| 1044<br>2.5mg/kg                                                                                                                                                                                          | 4   | 22.1              | 7.00           | 5.75           | 115.72      | 22.1                 | 8.42           | 6.60           | 183.39      | 21.5   | 8.73           | 4.21           | 77.37       |  |
|                                                                                                                                                                                                           | 32  | 24.3              | 6.27           | 4.94           | 76.51       | 24.8                 | 7.24           | 6.14           | 136.47      | 24.5   | 7.91           | 6.56           | 170.20      |  |
|                                                                                                                                                                                                           | 38  | 21.8              | 5.40/3.81      | 4.33/3.18      | 69.88       | 22.7                 | 6.87           | 5.44           | 101.65      | 21.5   | 9.56           | 6.54           | 204.45      |  |
|                                                                                                                                                                                                           | 42  | 23.3              | 5.04/6.18      | 4.93/2.70      | 83.78       | 23.9                 | 7.36/6.27      | 5.71/3.22      | 152.49      | 24.0   | 8.02/7.39      | 6.47/4.12      | 230.58      |  |
|                                                                                                                                                                                                           | 58  | 22.0              | 6.49/3.94/5.97 | 3.47/3.55/4.07 | 113.35      | 22.8                 | 7.69/9.51      | 5.65/4.39      | 214.38      | 22.6   | 15.30          | 5.99           | 274.48      |  |
|                                                                                                                                                                                                           | 94  | 23.7              | 7.20           | 4.61           | 76.51       | 24.8                 | 8.75           | 5.62           | 138.18      | 23.2   | 9.15           | 6.47           | 191.51      |  |
| ava                                                                                                                                                                                                       |     |                   |                |                | 89.29       |                      |                |                |             |        | 154.43         |                |             |  |
| SD                                                                                                                                                                                                        |     |                   |                |                | 20.06       |                      |                |                |             |        | 39.52          |                |             |  |
| 1044<br>5mg/kg                                                                                                                                                                                            | 46  | 22.1              | 6.58           | 5.44           | 97.36       | 21.1                 | 8.80           | 4.53           | 90.29       | 17.9   | 6.60           | 6.12           | 123.60      |  |
|                                                                                                                                                                                                           | 67  | 23.6              | 7.31           | 5.05           | 93.21       | 22.9                 | 7.94           | 6.07           | 146.27      | 22.0   | 8.04           | 5.89           | 139.46      |  |
|                                                                                                                                                                                                           | 83  | 22.9              | 5.54/4.09      | 5.34/3.08      | 98.39       | 23.3                 | 7.74           | 6.02           | 140.25      | 20.1   | 6.82           | 5.45           | 101.29      |  |
|                                                                                                                                                                                                           | 107 | 24.1              | 7.51           | 5.39           | 109.09      | 24.2                 | 7.95           | 6.01           | 143.58      | 22.8   | 8.73           | 6.52           | 185.56      |  |
|                                                                                                                                                                                                           | 116 | 23.3              | 6.99           | 5.63           | 110.78      | 23.4                 | 7.28           | 5.14           | 96.17       | 20.5   | 8.25           | 5.51           | 125.24      |  |
|                                                                                                                                                                                                           | 118 | 22.6              | 7.69           | 5.52           | 117.16      | 22.2                 | 7.89           | 5.66           | 126.38      | 19.5   | 8.51           | 5.21           | 115.50      |  |
| ava                                                                                                                                                                                                       |     |                   |                |                | 104.33      |                      |                |                |             |        | 123.82         |                |             |  |
| SD                                                                                                                                                                                                        |     |                   |                |                | 9.34        |                      |                |                |             |        | 24.74          |                |             |  |

V (mm<sup>3</sup>) = 1/2 × a × b<sup>2</sup> = 1/2 × major axis × minor axis × minor axis

| Group   | NO. | 3rd    |                |                |             | 4th    |                |                |             | 5th     |                |                 |             | 6th    |                |                |             |  |  |        |  |  |  |  |
|---------|-----|--------|----------------|----------------|-------------|--------|----------------|----------------|-------------|---------|----------------|-----------------|-------------|--------|----------------|----------------|-------------|--|--|--------|--|--|--|--|
|         |     | B.W(g) | Major axis(mm) | Minor axis(mm) | Volum (mm3) | B.W(g) | Major axis(mm) | Minor axis(mm) | Volum (mm3) | B.W (g) | Major axis(mm) | Minor axis (mm) | Volum (mm3) | B.W(g) | Major axis(mm) | Minor axis(mm) | Volum (mm3) |  |  |        |  |  |  |  |
| control | 37  | 23.3   | 9.53           | 7.83           | 292.14      | 23.9   | 11.21          | 7.77           | 338.39      | 23.3    | 11.57          | 9.59            | 532.04      | 25.1   | 12.25          | 9.70           | 576.30      |  |  |        |  |  |  |  |
|         | 56  | 22.5   | 8.66           | 6.54           | 185.20      | 22.9   | 9.73           | 6.65           | 215.14      | 23.0    | 11.04          | 8.05            | 357.71      | 23.2   | 12.00          | 8.29           | 412.34      |  |  |        |  |  |  |  |
|         | 66  | 23.9   | 8.10/7.52      | 5.68/5.69      | 252.40      | 23.5   | 8.73/7.58      | 5.98/5.33      | 263.76      | 23.7    | 13.53          | 9.16            | 567.62      | 24.6   | 15.20          | 10.23          | 795.36      |  |  |        |  |  |  |  |
|         | 79  | 24.7   | 12.16          | 8.12           | 400.88      | 26.0   | 13.01          | 8.73           | 495.76      | 25.5    | 14.93          | 9.42            | 662.42      | 25.4   | 17.61          | 7.63           | 512.60      |  |  |        |  |  |  |  |
|         | 91  | 24.7   | 11.35          | 6.27           | 223.10      | 23.4   | 12.78          | 6.04           | 233.12      | 22.7    | 13.17          | 7.29            | 349.95      | 23.2   | 15.78          | 8.17           | 526.65      |  |  |        |  |  |  |  |
|         | 120 | 21.6   | 8.22           | 6.27           | 161.58      | 21.1   | 9.46           | 6.95           | 228.47      | 20.8    | 9.85           | 7.73            | 294.28      | 20.5   | 10.81          | 9.23           | 460.47      |  |  |        |  |  |  |  |
|         | 5   | 23.8   | 11.08/5.87     | 7.58/3.00      | 344.72      | 23.2   | 12.03          | 7.90           | 375.40      | 22.9    | 13.94          | 9.25            | 596.37      | 23.4   | 14.46/6.41     | 8.72/4.46      | 613.51      |  |  |        |  |  |  |  |
|         | 77  | 21.5   | 10.87          | 5.80           | 182.83      | 24.0   | 11.76          | 6.62           | 257.69      | 23.6    | 11.30          | 6.48            | 237.25      | 23.5   | 12.60          | 6.54           | 269.46      |  |  |        |  |  |  |  |
| ava     |     |        |                |                | 255.36      |        |                |                |             | 300.97  |                |                 |             |        | 449.70         |                |             |  |  | 520.84 |  |  |  |  |
| SD      |     |        |                |                | 84.97       |        |                |                |             | 96.64   |                |                 |             |        | 158.18         |                |             |  |  | 153.87 |  |  |  |  |

|                 |     |      |           |           |        |      |           |           |        |        |            |           |        |      |            |           |        |  |  |        |  |  |  |  |
|-----------------|-----|------|-----------|-----------|--------|------|-----------|-----------|--------|--------|------------|-----------|--------|------|------------|-----------|--------|--|--|--------|--|--|--|--|
| carbo<br>3mg/kg | 119 | 21.4 | 9.37      | 6.46      | 195.51 | 21.9 | 9.65      | 7.01      | 237.10 | 21.5   | 12.10      | 7.19      | 312.76 | 21.8 | 12.93      | 8.27      | 442.16 |  |  |        |  |  |  |  |
|                 | 36  | 22.6 | 9.28      | 6.4       | 190.05 | 22.2 | 9.57      | 6.85      | 224.52 | 22.6   | 11.45      | 8.11      | 376.55 | 22.8 | 12.25      | 9.00      | 496.13 |  |  |        |  |  |  |  |
|                 | 60  | 23.5 | 8.05/5.93 | 6.55/4.64 | 236.52 | 23.3 | 6.71/8.70 | 4.86/6.75 | 277.44 | 23.8   | 12.50      | 7.93      | 393.03 | 23.6 | 13.18      | 9.45      | 588.50 |  |  |        |  |  |  |  |
|                 | 35  | 23.2 | 12.93     | 6.41      | 265.63 | 22.7 | 13.26     | 7.54      | 376.93 | 21.9   | 14.09      | 10.08     | 715.82 | 22.1 | 15.65      | 10.58     | 875.90 |  |  |        |  |  |  |  |
|                 | 111 | 21.0 | 9.67      | 6.74      | 219.64 | 21.1 | 10.15     | 6.76      | 231.92 | 20.8   | 10.84      | 6.76      | 247.68 | 20.4 | 11.38      | 8.00      | 364.16 |  |  |        |  |  |  |  |
|                 | 75  | 23.7 | 8.93/4.02 | 6.13/3.75 | 196.05 | 23.7 | 9.73/4.74 | 6.62/3.92 | 249.62 | 23.4   | 10.04/5.44 | 7.54/4.21 | 333.60 | 23.9 | 11.08/7.23 | 7.70/5.52 | 438.62 |  |  |        |  |  |  |  |
|                 | 84  | 21.9 | 8.78      | 6.38      | 178.69 | 23.5 | 9.31      | 6.43      | 192.46 | 22.6   | 10.82      | 6.69      | 242.13 | 22.6 | 11.35      | 8.15      | 376.95 |  |  |        |  |  |  |  |
|                 | 80  | 24.3 | 7.41      | 6.62      | 162.37 | 25.0 | 7.81      | 9.49      | 351.68 | 24.7   | 8.90       | 7.23      | 232.61 | 25.4 | 9.69       | 7.42      | 266.75 |  |  |        |  |  |  |  |
| ava             |     |      |           |           | 205.56 |      |           |           |        | 267.71 |            |           |        |      | 356.77     |           |        |  |  | 481.15 |  |  |  |  |
| SD              |     |      |           |           | 33.35  |      |           |           |        | 64.53  |            |           |        |      | 157.46     |           |        |  |  | 185.71 |  |  |  |  |

|                  |    |      |            |           |        |      |             |           |        |        |             |           |        |      |        |       |        |  |  |        |  |  |  |  |
|------------------|----|------|------------|-----------|--------|------|-------------|-----------|--------|--------|-------------|-----------|--------|------|--------|-------|--------|--|--|--------|--|--|--|--|
| 1044<br>2.5mg/kg | 4  | 21.8 | 10.82      | 7.19      | 279.68 | 21.0 | 9.78        | 7.49      | 274.33 | 21.2   | 11.86       | 8.94      | 473.95 | 22.3 | 11.64  | 9.52  | 527.47 |  |  |        |  |  |  |  |
|                  | 32 | 23.8 | 8.09       | 7.06      | 201.62 | 23.9 | 9.07        | 6.60      | 197.54 | 23.8   | 9.63        | 7.57      | 275.92 | 24.5 | 10.73  | 6.59  | 232.99 |  |  |        |  |  |  |  |
|                  | 38 | 21.8 | 10.39      | 6.83      | 242.34 | 21.7 | 10.27       | 6.64      | 226.40 | 21.9   | 11.01       | 7.99      | 351.44 | 23.0 | 11.46  | 7.60  | 330.96 |  |  |        |  |  |  |  |
|                  | 42 | 23.3 | 10.48      | 7.34      | 282.31 | 23.2 | 8.47/8.71   | 8.33/4.30 | 374.39 | 23.1   | 8.94/9.09   | 8.59/5.76 | 480.62 | 24.2 | 12.73  | 9.32  | 552.88 |  |  |        |  |  |  |  |
|                  | 58 | 22.4 | 9.06/11.07 | 4.67/6.47 | 330.49 | 22.3 | 12.08/10.18 | 7.23/5.34 | 460.87 | 22.7   | 11.45/12.40 | 7.13/8.21 | 708.95 | 23.7 | 17.10  | 10.62 | 964.31 |  |  |        |  |  |  |  |
|                  | 94 | 23.4 | 10.21      | 7.18      | 263.28 | 22.9 | 10.39       | 8.08      | 339.16 | 23.0   | 11.35       | 7.71      | 337.35 | 24.1 | 11.27  | 8.41  | 398.55 |  |  |        |  |  |  |  |
| ava              |    |      |            |           | 266.62 |      |             |           |        | 312.12 |             |           |        |      | 438.04 |       |        |  |  | 501.19 |  |  |  |  |
| SD               |    |      |            |           | 43.18  |      |             |           |        | 98.63  |             |           |        |      | 155.19 |       |        |  |  | 256.62 |  |  |  |  |

|                |     |      |      |      |        |      |       |      |        |        |       |      |        |      |           |           |        |  |  |        |  |  |  |  |
|----------------|-----|------|------|------|--------|------|-------|------|--------|--------|-------|------|--------|------|-----------|-----------|--------|--|--|--------|--|--|--|--|
| 1044<br>5mg/kg | 46  | 19.4 | 7.34 | 6.76 | 167.71 | 19.8 | 8.29  | 7.53 | 235.03 | 20.8   | 8.53  | 7.91 | 266.85 | 20.9 | 9.35      | 7.90      | 291.77 |  |  |        |  |  |  |  |
|                | 67  | 22.1 | 9.20 | 6.57 | 198.56 | 22.2 | 9.34  | 6.45 | 194.28 | 23.9   | 9.61  | 6.65 | 212.49 | 23.9 | 9.72      | 7.63      | 282.93 |  |  |        |  |  |  |  |
|                | 83  | 23.6 | 8.27 | 6.70 | 185.62 | 22.9 | 7.87  | 7.51 | 221.93 | 23.3   | 9.83  | 7.08 | 246.37 | 23.2 | 9.66/5.56 | 7.41/4.56 | 323.01 |  |  |        |  |  |  |  |
|                | 107 | 24.5 | 9.53 | 6.26 | 186.73 | 24.4 | 8.83  | 7.32 | 236.57 | 25.2   | 10.32 | 7.65 | 301.98 | 25.2 | 11.67     | 8.26      | 398.11 |  |  |        |  |  |  |  |
|                | 116 | 24.5 | 8.28 | 6.07 | 152.54 | 23.8 | 10.20 | 6.55 | 218.80 | 24.5   | 10.38 | 7.05 | 257.96 | 23.8 | 12.49     | 7.36      | 338.29 |  |  |        |  |  |  |  |
|                | 118 | 21.3 | 8.32 | 6.07 | 153.27 | 20.6 | 9.56  | 6.96 | 231.55 | 21.5   | 10.13 | 7.60 | 292.55 | 21.0 | 11.41     | 7.91      | 356.95 |  |  |        |  |  |  |  |
| ava            |     |      |      |      | 174.07 |      |       |      |        | 223.03 |       |      |        |      | 263.03    |           |        |  |  | 331.84 |  |  |  |  |
| SD             |     |      |      |      | 19.13  |      |       |      |        | 15.78  |       |      |        |      | 32.44     |           |        |  |  | 42.75  |  |  |  |  |

$$V \text{ (mm}^3\text{)} = 1/2 \times a \times b^2 = 1/2 \times \text{major axis} \times \text{minor axis} \times \text{minor axis}$$

| Group   | NO. | 7th    |                |                |             | 8th    |                 |                |             | 9th    |                |                |             | 10th   |                |                |             |  |  |
|---------|-----|--------|----------------|----------------|-------------|--------|-----------------|----------------|-------------|--------|----------------|----------------|-------------|--------|----------------|----------------|-------------|--|--|
|         |     | B.W(g) | Major axis(mm) | Minor axis(mm) | Volum (mm3) | B.W(g) | Major axis (mm) | Minor axis(mm) | Volum (mm3) | B.W(g) | Major axis(mm) | Minor axis(mm) | Volum (mm3) | B.W(g) | Major axis(mm) | Minor axis(mm) | Volum (mm3) |  |  |
| control | 37  | 24.5   | 13.26          | 9.57           | 607.21      | 23.7   | 13.15           | 10.12          | 673.37      | 23.6   | 14.27          | 10.26          | 751.08      | 23.4   | 15.27          | 10.97          | 918.80      |  |  |
|         | 56  | 23.4   | 12.67          | 8.28           | 434.32      | 23.0   | 13.52           | 9.28           | 582.16      | 22.8   | 14.57          | 9.70           | 685.45      | 23.2   | 15.39          | 10.08          | 781.86      |  |  |
|         | 66  | 25.1   | 16.59          | 10.86          | 978.31      | 24.0   | 16.72           | 12.07          | 1217.93     | 24.7   | 17.84          | 12.70          | 1438.71     | 24.6   | 17.87          | 13.31          | 1582.89     |  |  |
|         | 79  | 24.9   | 18.30          | 11.43          | 1195.40     | 26.0   | 19.81           | 11.85          | 1390.88     | 25.7   | 20.81          | 12.46          | 1615.39     | 25.9   | 21.72          | 12.73          | 1759.89     |  |  |
|         | 91  | 22.3   | 16.09          | 8.80           | 623.00      | 23.9   | 17.63           | 9.33           | 767.34      | 24.1   | 18.72          | 9.94           | 924.80      | 23.4   | 19.65          | 10.99          | 1186.66     |  |  |
|         | 120 | 21.0   | 10.72          | 9.59           | 492.95      | 19.8   | 11.12           | 8.87           | 437.44      | 21.0   | 12.43          | 10.63          | 702.28      | 20.8   | 12.35          | 10.43          | 671.75      |  |  |
|         | 5   | 24.0   | 15.63          | 9.62           | 723.23      | 24.4   | 18.00           | 9.11           | 746.93      | 24.7   | 18.06          | 9.76           | 860.18      | 24.4   | 18.67          | 9.10           | 773.03      |  |  |
|         | 77  | 24.1   | 14.43          | 7.79           | 437.84      | 24.5   | 14.11           | 8.04           | 456.05      | 25.1   | 14.67          | 8.33           | 508.97      | 24.9   | 15.06          | 9.25           | 644.29      |  |  |
| ava     |     |        |                |                | 686.53      |        |                 |                |             | 784.01 |                |                |             |        | 935.86         |                |             |  |  |
| SD      |     |        |                |                | 272.21      |        |                 |                |             | 346.18 |                |                |             |        | 388.06         |                |             |  |  |

|                 |     |      |            |           |        |      |            |           |        |        |            |           |         |      |            |           |         |  |  |
|-----------------|-----|------|------------|-----------|--------|------|------------|-----------|--------|--------|------------|-----------|---------|------|------------|-----------|---------|--|--|
| carbo<br>3mg/kg | 119 | 22.8 | 14.35      | 8.42      | 508.68 | 23.5 | 14.93      | 10.46     | 816.76 | 23.3   | 15.36      | 10.20     | 799.03  | 23.3 | 16.99      | 10.82     | 994.53  |  |  |
|                 | 36  | 22.4 | 13.33      | 8.94      | 532.69 | 22.0 | 14.86      | 10.27     | 783.66 | 22.2   | 15.95      | 11.18     | 996.81  | 21.8 | 16.07      | 11.33     | 1031.44 |  |  |
|                 | 60  | 23.4 | 13.79      | 9.01      | 559.74 | 24.2 | 14.48      | 10.39     | 781.57 | 23.3   | 16.20      | 11.54     | 1078.69 | 23.3 | 16.49      | 12.11     | 1209.15 |  |  |
|                 | 35  | 21.7 | 15.78      | 11.00     | 954.69 | 23.0 | 15.96      | 8.88      | 629.26 | 22.6   | 16.75      | 10.17     | 866.22  | 22.2 | 16.62      | 10.37     | 893.63  |  |  |
|                 | 111 | 19.1 | 11.93      | 8.51      | 431.99 | 19.7 | 12.64      | 8.81      | 490.53 | 19.5   | 14.69      | 9.01      | 596.27  | 19.6 | 15.08      | 9.18      | 635.41  |  |  |
|                 | 75  | 23.4 | 11.01/6.87 | 8.60/5.74 | 520.32 | 23.6 | 11.67/7.70 | 8.62/5.71 | 559.09 | 23.4   | 11.82/8.09 | 9.39/6.59 | 696.76  | 23.1 | 13.03/8.83 | 9.95/6.86 | 852.77  |  |  |
|                 | 84  | 21.2 | 12.74      | 8.58      | 468.94 | 20.7 | 12.99      | 8.16      | 432.47 | 21.9   | 13.36      | 8.57      | 490.61  | 21.8 | 13.69      | 9.69      | 642.72  |  |  |
|                 | 80  | 25.6 | 9.10       | 7.58      | 261.43 | 25.7 | 8.91       | 7.08      | 223.31 | 26.1   | 9.80       | 7.82      | 299.65  | 24.8 | 9.40       | 7.88      | 291.84  |  |  |
| ava             |     |      |            |           | 529.81 |      |            |           |        | 589.58 |            |           |         |      | 728.00     |           |         |  |  |
| SD              |     |      |            |           | 195.40 |      |            |           |        | 206.08 |            |           |         |      | 261.20     |           |         |  |  |

|                  |    |      |            |           |         |      |            |           |         |        |            |           |         |      |            |           |         |  |  |
|------------------|----|------|------------|-----------|---------|------|------------|-----------|---------|--------|------------|-----------|---------|------|------------|-----------|---------|--|--|
| 1044<br>2.5mg/kg | 4  | 22.0 | 12.44      | 9.88      | 607.16  | 21.6 | 12.70      | 9.60      | 585.22  | 21.9   | 13.65      | 5.93      | 240.00  | 22.3 | 13.81      | 9.96      | 684.99  |  |  |
|                  | 32 | 25.0 | 10.18      | 8.40      | 359.15  | 23.9 | 8.75       | 8.64      | 326.59  | 23.9   | 9.01       | 8.66      | 337.86  | 23.9 | 10.08      | 9.61      | 465.45  |  |  |
|                  | 38 | 22.9 | 10.73      | 7.69      | 317.27  | 22.5 | 11.33      | 7.71      | 336.75  | 22.5   | 11.41      | 7.56      | 326.06  | 22.2 | 11.26      | 7.75      | 338.15  |  |  |
|                  | 42 | 25.0 | 11.83/7.58 | 6.47/7.01 | 433.85  | 24.1 | 11.67/7.78 | 6.87/6.99 | 465.46  | 24.3   | 13.05/6.88 | 7.76/6.65 | 545.06  | 24.2 | 13.48/8.12 | 7.23/7.12 | 558.14  |  |  |
|                  | 58 | 23.8 | 16.92      | 12.93     | 1414.38 | 22.6 | 16.63      | 13.24     | 1457.60 | 23.7   | 16.86      | 12.55     | 1327.75 | 23.5 | 17.33      | 13.17     | 1502.93 |  |  |
|                  | 94 | 23.8 | 11.39      | 8.68      | 429.07  | 23.2 | 13.29      | 9.69      | 623.94  | 23.4   | 13.53      | 9.47      | 606.69  | 22.5 | 12.29      | 10.14     | 631.83  |  |  |
| ava              |    |      |            |           | 593.48  |      |            |           |         | 632.59 |            |           |         |      | 563.90     |           |         |  |  |
| SD               |    |      |            |           | 414.19  |      |            |           |         | 422.39 |            |           |         |      | 399.56     |           |         |  |  |

|                |     |      |       |      |        |      |       |       |        |        |            |           |        |      |        |       |        |  |  |
|----------------|-----|------|-------|------|--------|------|-------|-------|--------|--------|------------|-----------|--------|------|--------|-------|--------|--|--|
| 1044<br>5mg/kg | 46  | 21.3 | 8.95  | 7.62 | 259.84 | 22.5 | 9.91  | 9.21  | 420.30 | 22.0   | 11.16      | 8.77      | 429.17 | 22.3 | 11.54  | 9.02  | 469.45 |  |  |
|                | 67  | 24.1 | 10.66 | 7.92 | 334.33 | 25.4 | 10.20 | 8.19  | 342.09 | 23.9   | 11.32      | 7.82      | 346.12 | 23.5 | 10.98  | 8.07  | 357.54 |  |  |
|                | 83  | 23.4 | 10.84 | 7.93 | 340.84 | 24.0 | 11.17 | 8.00  | 357.44 | 23.2   | 10.86/6.70 | 8.15/6.48 | 501.34 | 23.5 | 12.54  | 9.65  | 583.88 |  |  |
|                | 107 | 25.2 | 12.12 | 7.50 | 340.88 | 26.0 | 13.77 | 10.15 | 709.31 | 25.9   | 14.50      | 9.67      | 677.94 | 26.0 | 15.22  | 10.44 | 829.44 |  |  |
|                | 116 | 24.3 | 10.81 | 7.29 | 287.24 | 25.1 | 12.52 | 7.36  | 339.10 | 23.8   | 13.36      | 7.36      | 361.85 | 24.9 | 13.74  | 8.11  | 451.97 |  |  |
|                | 118 | 22.2 | 11.35 | 7.11 | 286.88 | 23.1 | 11.58 | 7.74  | 346.87 | 21.5   | 12.52      | 8.27      | 428.14 | 22.5 | 14.38  | 9.29  | 620.53 |  |  |
| ava            |     |      |       |      | 308.33 |      |       |       |        | 419.18 |            |           |        |      | 457.43 |       |        |  |  |
| SD             |     |      |       |      | 34.78  |      |       |       |        | 145.31 |            |           |        |      | 121.44 |       |        |  |  |

$$V \text{ (mm}^3\text{)} = 1/2 \times a \times b^2 = 1/2 \times \text{major axis} \times \text{minor axis} \times \text{minor axis}$$

|                  |     | 11th   |                |                |             | 12th (the last time ) |                |                |             | Anatomy            |           |            |                      |                       |       |       |
|------------------|-----|--------|----------------|----------------|-------------|-----------------------|----------------|----------------|-------------|--------------------|-----------|------------|----------------------|-----------------------|-------|-------|
| Group            | NO. | B.W(g) | Major axis(mm) | Minor axis(mm) | Volum (mm3) | B.W(g)                | Major axis(mm) | Minor axis(mm) | Volum (mm3) | weight of tumor(g) | liver (g) | Kidney (g) | Coefficient of liver | Coefficient of kidney |       |       |
| control          | 37  | 23.0   | 15.47          | 10.97          | 930.84      | 24.3                  | 15.43          | 12.26          | 1159.62     | 0.727              | 1.511     | 0.315      | 0.0622               | 0.0130                |       |       |
|                  | 56  | 23.8   | 15.73          | 10.77          | 912.28      | 23.6                  | 16.35          | 10.83          | 958.84      | 0.727              | 1.511     | 0.315      | 0.0640               | 0.0133                |       |       |
|                  | 66  | 25.2   | 18.35          | 14.03          | 1806.02     | 24.5                  | 18.82          | 14.82          | 2066.74     | 1.252              | 1.638     | 0.369      | 0.0669               | 0.0151                |       |       |
|                  | 79  | 26.5   | 22.14          | 14.43          | 2305.05     | 26.7                  | 23.32          | 13.65          | 2172.52     | 1.775              | 1.778     | 0.339      | 0.0666               | 0.0127                |       |       |
|                  | 91  | 24.0   | 21.21          | 11.63          | 1434.40     | 23.9                  | 22.21          | 12.08          | 1620.51     | 1.701              | 1.392     | 0.326      | 0.0582               | 0.0136                |       |       |
|                  | 120 | 21.6   | 12.61          | 10.91          | 750.47      | 21.5                  | 12.78/9.07     | 8.44/9.06      | 827.43      | 0.804              | 1.184     | 0.263      | 0.0551               | 0.0122                |       |       |
|                  | 5   | 21.4   | 18.70          | 9.82           | 901.64      | 25.2                  | 18.55          | 10.72          | 1065.87     | 1.044              | 1.486     | 0.313      | 0.0590               | 0.0124                |       |       |
|                  | 77  | 25.1   | 15.02          | 9.35           | 656.54      | 24.9                  | 15.03          | 8.04           | 485.78      | 0.542              | 1.560     | 0.356      | 0.0627               | 0.0143                |       |       |
| ava              |     |        |                |                | 1212.16     |                       |                |                |             |                    | 1294.66   | 1.07       | 1.51                 | 0.32                  | 0.062 | 0.013 |
| SD               |     |        |                |                | 583.56      |                       |                |                |             |                    | 601.06    | 0.47       | 0.17                 | 0.03                  | 0.004 | 0.001 |
| carbo<br>3mg/kg  | 119 | 22.7   | 16.72          | 12.67          | 1342.02     | 23.0                  | 17.90          | 11.71          | 1227.26     | 0.942              | 1.091     | 0.301      | 0.0474               | 0.0131                |       |       |
|                  | 36  | 23.1   | 16.00          | 11.64          | 1083.92     | 22.7                  | 16.92          | 11.87          | 1191.99     | 0.942              | 1.091     | 0.301      | 0.0481               | 0.0133                |       |       |
|                  | 60  | 23.7   | 16.77          | 12.77          | 1367.37     | 22.4                  | 15.99          | 13.13          | 1378.31     | 1.038              | 1.199     | 0.326      | 0.0535               | 0.0146                |       |       |
|                  | 35  | 22.8   | 16.59          | 10.13          | 851.21      | 22.8                  | 16.00          | 10.03          | 804.81      | 0.885              | 1.406     | 0.350      | 0.0617               | 0.0154                |       |       |
|                  | 111 | 19.8   | 13.78          | 9.29           | 594.64      | 19.6                  | 14.53          | 9.97           | 722.15      | 0.618              | 0.985     | 0.258      | 0.0503               | 0.0132                |       |       |
|                  | 75  | 23.5   | 13.74/7.43     | 10.57/6.61     | 929.87      | 22.9                  | 14.35/8.05     | 10.69/6.73     | 1002.23     | 0.990              | 1.140     | 0.287      | 0.0498               | 0.0125                |       |       |
|                  | 84  | 21.4   | 15.40          | 10.01          | 771.54      | 21.1                  | 15.40          | 8.56           | 564.21      | 0.618              | 1.168     | 0.292      | 0.0554               | 0.0138                |       |       |
|                  | 80  | 25.4   | 10.32          | 8.16           | 343.58      | 25.1                  | 11.07          | 8.33           | 384.07      | 0.245              | 1.520     | 0.366      | 0.0606               | 0.0146                |       |       |
| ava              |     |        |                |                | 910.52      |                       |                |                |             |                    | 909.38    | 0.78       | 1.20                 | 0.31                  | 0.053 | 0.014 |
| SD               |     |        |                |                | 352.42      |                       |                |                |             |                    | 348.57    | 0.27       | 0.18                 | 0.04                  | 0.005 | 0.001 |
| 1044<br>2.5mg/kg | 4   | 22.6   | 14.54          | 9.79           | 696.79      | 23.2                  | 14.36          | 10.39          | 775.10      | 0.512              | 1.469     | 0.348      | 0.0633               | 0.0150                |       |       |
|                  | 32  | 24.4   | 10.62          | 9.06           | 435.86      | 24.9                  | 10.15          | 8.56           | 371.86      | 0.245              | 1.826     | 0.351      | 0.0733               | 0.0141                |       |       |
|                  | 38  | 23.0   | 11.55          | 8.49           | 416.26      | 22.6                  | 11.50          | 7.90           | 358.86      | 0.352              | 1.472     | 0.339      | 0.0651               | 0.0150                |       |       |
|                  | 42  | 24.3   | 13.97/8.04     | 8.54/7.32      | 724.83      | 24.9                  | 14.43/9.23     | 7.80/8.10      | 741.75      | 0.569              | 1.481     | 0.330      | 0.0595               | 0.0133                |       |       |
|                  | 58  | 23.8   | 17.95          | 12.93          | 1500.48     | 24.5                  | 18.01          | 14.47          | 1885.48     | 1.004              | 1.557     | 0.342      | 0.0636               | 0.0140                |       |       |
|                  | 94  | 22.9   | 14.24          | 9.69           | 668.54      | 22.3                  | 15.01          | 10.68          | 856.04      | 0.592              | 1.43      | 0.321      | 0.0641               | 0.0144                |       |       |
| ava              |     |        |                |                | 740.46      |                       |                |                |             |                    | 831.51    | 0.55       | 1.54                 | 0.34                  | 0.065 | 0.014 |
| SD               |     |        |                |                | 395.69      |                       |                |                |             |                    | 558.10    | 0.26       | 0.15                 | 0.01                  | 0.005 | 0.001 |
| 1044<br>5mg/kg   | 46  | 21.8   | 11.94          | 9.38           | 525.27      | 21.1                  | 11.74          | 9.30           | 507.70      | 0.435              | 1.187     | 0.307      | 0.0563               | 0.0145                |       |       |
|                  | 67  | 24.0   | 10.96          | 6.00           | 197.28      | 23.6                  | 11.30          | 8.65           | 422.75      | 0.365              | 1.240     | 0.341      | 0.0525               | 0.0144                |       |       |
|                  | 83  | 23.5   | 12.63          | 10.37          | 679.10      | 23.2                  | 12.87          | 11.05          | 785.73      | 0.499              | 1.420     | 0.292      | 0.0612               | 0.0126                |       |       |
|                  | 107 | 26.3   | 17.23          | 9.58           | 790.65      | 26.0                  | 17.68          | 10.75          | 1021.57     | 1.046              | 1.715     | 0.368      | 0.0660               | 0.0142                |       |       |
|                  | 116 | 25.1   | 14.79          | 9.22           | 628.64      | 23.8                  | 16.06          | 8.95           | 643.22      | 0.568              | 1.677     | 0.362      | 0.0705               | 0.0152                |       |       |
|                  | 118 | 23.0   | 13.99          | 9.47           | 627.32      | 22.6                  | 14.83          | 8.29           | 509.59      | 0.451              | 1.366     | 0.309      | 0.0604               | 0.0137                |       |       |
| ava              |     |        |                |                | 574.71      |                       |                |                |             |                    | 648.43    | 0.56       | 1.43                 | 0.33                  | 0.061 | 0.014 |
| SD               |     |        |                |                | 204.01      |                       |                |                |             |                    | 222.77    | 0.25       | 0.22                 | 0.03                  | 0.006 | 0.001 |
